# Supplementary material for: Transcriptional Analysis of Lactobacillus brevis to N-Butanol and Ferulic Acid Stress Responses
Source: PLoS One. 2011 Aug 2;6(8):e21438. doi: 10.1371/journal.pone.0021438 (PMC3149049; doi:10.1371/journal.pone.0021438)
Supplement: Table S2 — Statistically significant log gene expression values for L. brevis cultures responding to 2% n-butanol stress. (XLSX) [file pone.0021438.s005.xlsx]

## Sheet: Down
Gene Description	COG(s)	T1	T2	T3	15 min
LVIS_0053:hypothetical protein LVIS_0053	[S] Function unknown	-1.317	-0.935162	-0.640501		Challenge: 2% butanol
LVIS_0064:hypothetical protein LVIS_0064	[S] Function unknown	-1.45212	-0.708117	-0.894656
LVIS_0159:transcriptional regulator	[K] Transcription	-1.31214	-1.29204	-1.20479
LVIS_0160:Zn-dependent protease	[S] Function unknown	-1.27902	-1.12202	-0.803675
LVIS_0247:flavodoxin	[C] Energy production and conversion	-1.27994	-1.05325	-0.858191
LVIS_0322:transcriptional regulator	[K] Transcription	-1.57425	-1.6159	-1.37076
LVIS_0424:tyrosyl-tRNA synthetase	[J] Translation, ribosomal structure and biogenesis	-1.47967	-1.66057	-1.60926
LVIS_0480:putative phosphoketolase	[G] Carbohydrate transport and metabolism	-1.30019	-0.562332	-1.2439
LVIS_0589:50S ribosomal protein L1	[J] Translation, ribosomal structure and biogenesis	-1.50903	-1.21801	-1.15386
LVIS_0590:ribosomal protein L10	[J] Translation, ribosomal structure and biogenesis	-1.86745	-1.77384	-1.45926
LVIS_0619:amino acid transporter	[E] Amino acid transport and metabolism	-1.50519	-1.08563	-0.761578
LVIS_0661:glyceraldehyde-3-phosphate dehydrogenase	[G] Carbohydrate transport and metabolism	-1.60884	-1.0174	-1.19158
LVIS_0689:glucosamine-6-phosphate isomerase	[G] Carbohydrate transport and metabolism	-1.71319	-1.54336	-1.3798
LVIS_0690:muramidase (flagellum-specific)	[N] Cell motility,[U] Intracellular trafficking, secretion, and vesicular transport	-1.73021	-1.15222	-0.798464
LVIS_0698:cell surface protein	[M] Cell wall/membrane/envelope biogenesis	-1.28569	-0.70364	-0.642579
LVIS_0779:nucleoid DNA-binding protein	[L] Replication, recombination and repair	-1.34163	-1.75565	-1.26385
LVIS_1036:threonyl-tRNA synthetase	[J] Translation, ribosomal structure and biogenesis	-1.37992	-1.42121	-1.34257
LVIS_1138:hypothetical protein LVIS_1138	[S] Function unknown	-1.38544	2.53368	1.5104
LVIS_1326:D-alanine--D-alanyl carrier protein ligase	[Q] Secondary metabolites biosynthesis, transport and catabolism	-1.2907	-1.40699	-1.19514
LVIS_1376:adenine phosphoribosyltransferase	[F] Nucleotide transport and metabolism	-1.74106	-1.11627	-1.32311
LVIS_1389:elongation factor Tu	[J] Translation, ribosomal structure and biogenesis	-2.16821	-1.9121	-1.69468
LVIS_1416:hypothetical protein LVIS_1416	[S] Function unknown	-2.66957	-2.21655	-2.54541
LVIS_1417:cell wall-associated hydrolase	[M] Cell wall/membrane/envelope biogenesis	-1.77964	-1.11037	-0.428977
LVIS_1419:cell wall-associated hydrolase	[M] Cell wall/membrane/envelope biogenesis	-1.29878	-0.926469	-0.994211
LVIS_1424:N-acetylmuramic acid-6-phosphate etherase	[R] General function prediction only	-1.61414	-0.160988	0.163808
LVIS_1475:hypothetical protein LVIS_1475	[S] Function unknown	-1.41574	-1.62756	-1.63557
LVIS_1496:N-acetylmuramoyl-L-alanine amidase	[M] Cell wall/membrane/envelope biogenesis	-1.57815	-1.27336	-1.27924
LVIS_1523:S-adenosylmethionine synthetase	[H] Coenzyme transport and metabolism	-2.04051	-1.73677	-1.27447
LVIS_1558:NAD(FAD)-dependent dehydrogenase	[R] General function prediction only	-1.37619	-1.28807	-1.51716
LVIS_1575:glycosyltransferase-like protein	[M] Cell wall/membrane/envelope biogenesis	-1.77907	-1.04209	-0.843497
LVIS_1641:cytochrome bd-type quinol oxidase, subunit 2	[C] Energy production and conversion	-1.29556	-0.893509	-0.254626
LVIS_1720:acetyltransferase	[J] Translation, ribosomal structure and biogenesis	-2.61998	-2.30524	-1.62316
LVIS_1722:transcriptional regulator	[S] Function unknown	-1.35347	-0.847089	-0.45789
LVIS_1809:cell wall-associated hydrolase	[M] Cell wall/membrane/envelope biogenesis	-1.47627	-0.331183	-0.420371
LVIS_1834:hypothetical protein LVIS_1834	[S] Function unknown	-1.77316	-1.09946	-1.04799
LVIS_1907:phosphomannomutase	[G] Carbohydrate transport and metabolism	-1.78888	-1.19929	-0.375438
LVIS_1908:aldose 1-epimerase	[G] Carbohydrate transport and metabolism	-1.33027	-0.435161	-0.0945416
LVIS_1956:ABC-type metal ion transport system, ATPase component	[P] Inorganic ion transport and metabolism	-1.38468	-0.883641	-0.93323
LVIS_1957:ABC-type metal ion transport system, periplasmic component/surface antigen	[P] Inorganic ion transport and metabolism	-1.60139	-0.784052	-0.725352
LVIS_1958:3-methyladenine DNA glycosylase	[L] Replication, recombination and repair	-1.91631	-1.6414	-0.848082
LVIS_1959:ABC-type oligopeptide transport system, periplasmic component	[E] Amino acid transport and metabolism	-2.24811	-1.71419	-0.743325
LVIS_1960:hypothetical protein LVIS_1960	[S] Function unknown	-1.96429	-1.23274	-0.569948
LVIS_1981:hypothetical protein LVIS_1981	[S] Function unknown	-1.47217	-1.55255	-1.75296
LVIS_1982:hypothetical protein LVIS_1982	[S] Function unknown	-2.03051	-2.00323	-1.85104
LVIS_1983:hypothetical protein LVIS_1983	[S] Function unknown	-1.28903	-0.835365	-1.31397
LVIS_2023:carbamate kinase	[E] Amino acid transport and metabolism	-2.10087	-1.92977	-1.32613
LVIS_2024:transaminase	[E] Amino acid transport and metabolism	-2.52116	-1.84852	-1.17774
LVIS_2025:amino acid transporter	[E] Amino acid transport and metabolism	-2.48926	-1.58782	-0.858186
LVIS_2026:ornithine carbamoyltransferase	[E] Amino acid transport and metabolism	-2.65492	-1.86069	-0.324356
LVIS_2027:arginine deiminase	[E] Amino acid transport and metabolism	-3.69775	-2.03942	-0.885199
LVIS_2032:hypothetical protein LVIS_2032	[E] Amino acid transport and metabolism	-1.33582	-1.11423	-0.500079
LVIS_2047:cyclopropane fatty acid synthase-like protein	[M] Cell wall/membrane/envelope biogenesis	-1.48367	-1.13674	-0.762059
LVIS_2048:hypothetical protein LVIS_2048	[S] Function unknown	-1.31976	-0.623463	-0.540526
LVIS_2049:branched-chain amino acid permease (azaleucine resistance)	[E] Amino acid transport and metabolism	-1.2892	-1.02895	-0.705557
LVIS_2070:xanthine/uracil/vitamin C permease	[R] General function prediction only	-1.29293	-1.08054	-0.699781
LVIS_2085:hypothetical protein LVIS_2085	[S] Function unknown	-1.96875	-1.91997	-1.45863
LVIS_2086:hypothetical protein LVIS_2086	[S] Function unknown	-1.86101	-1.58874	-1.19005
LVIS_2133:cell wall-associated hydrolase	[M] Cell wall/membrane/envelope biogenesis	-1.5425	-0.314421	-0.493983
LVIS_2161:hypothetical protein LVIS_2161	[S] Function unknown	-1.43611	-1.21398	-1.42563
LVIS_2169:phosphoglycerate mutase family protein	[G] Carbohydrate transport and metabolism	-1.64485	-1.43805	-1.38657
LVIS_2211:Na+/H+ antiporter	[C] Energy production and conversion	-2.07186	-1.69883	-1.31225
LVIS_2212:amino acid transporter	[E] Amino acid transport and metabolism	-1.70193	-1.43185	-0.713392
LVIS_2213:glutamate decarboxylase	[E] Amino acid transport and metabolism	-2.26781	-1.77921	-1.17285
LVIS_2274:xanthine/uracil/vitamin C permease	[R] General function prediction only	-1.45017	-1.37008	-1.21242
Gene Description	COG(s)	T1	T2	T3	75 min
LVIS_0078:glutamate gamma-aminobutyrate antiporter	[E] Amino acid transport and metabolism	-0.950123	-1.72516	-1.29744
LVIS_0159:transcriptional regulator	[K] Transcription	-1.31214	-1.29204	-1.20479
LVIS_0322:transcriptional regulator	[K] Transcription	-1.57425	-1.6159	-1.37076
LVIS_0333:NAD(FAD)-dependent dehydrogenase	[R] General function prediction only	-0.752024	-1.44592	-1.36107
LVIS_0424:tyrosyl-tRNA synthetase	[J] Translation, ribosomal structure and biogenesis	-1.47967	-1.66057	-1.60926
LVIS_0589:50S ribosomal protein L1	[J] Translation, ribosomal structure and biogenesis	-1.50903	-1.21801	-1.15386
LVIS_0590:ribosomal protein L10	[J] Translation, ribosomal structure and biogenesis	-1.86745	-1.77384	-1.45926
LVIS_0689:glucosamine-6-phosphate isomerase	[G] Carbohydrate transport and metabolism	-1.71319	-1.54336	-1.3798
LVIS_0779:nucleoid DNA-binding protein	[L] Replication, recombination and repair	-1.34163	-1.75565	-1.26385
LVIS_0803:hypothetical protein LVIS_0803	[S] Function unknown	-1.08706	-1.45791	-1.46209
LVIS_0883:hypothetical protein LVIS_0883	[S] Function unknown	-0.807896	-1.40818	-1.34146
LVIS_1036:threonyl-tRNA synthetase	[J] Translation, ribosomal structure and biogenesis	-1.37992	-1.42121	-1.34257
LVIS_1100:hypothetical protein LVIS_1100	[S] Function unknown	-0.900939	-1.49107	-1.14598
LVIS_1143:hypothetical protein LVIS_1143	[S] Function unknown	-0.482565	-1.57537	-1.69715
LVIS_1144:hypothetical protein LVIS_1144	[S] Function unknown	-0.857688	-1.44551	-1.31326
LVIS_1326:D-alanine--D-alanyl carrier protein ligase	[Q] Secondary metabolites biosynthesis, transport and catabolism	-1.2907	-1.40699	-1.19514
LVIS_1389:elongation factor Tu	[J] Translation, ribosomal structure and biogenesis	-2.16821	-1.9121	-1.69468
LVIS_1416:hypothetical protein LVIS_1416	[S] Function unknown	-2.66957	-2.21655	-2.54541
LVIS_1453:protein required for the initiation of cell division	[D] Cell cycle control, cell division, chromosome partitioning	-0.460162	-1.1858	-1.12731
LVIS_1475:hypothetical protein LVIS_1475	[S] Function unknown	-1.41574	-1.62756	-1.63557
LVIS_1496:N-acetylmuramoyl-L-alanine amidase	[M] Cell wall/membrane/envelope biogenesis	-1.57815	-1.27336	-1.27924
LVIS_1523:S-adenosylmethionine synthetase	[H] Coenzyme transport and metabolism	-2.04051	-1.73677	-1.27447
LVIS_1558:NAD(FAD)-dependent dehydrogenase	[R] General function prediction only	-1.37619	-1.28807	-1.51716
LVIS_1712:amino acid transporter	[E] Amino acid transport and metabolism	0.236019	-1.47107	-1.1791
LVIS_1720:acetyltransferase	[J] Translation, ribosomal structure and biogenesis	-2.61998	-2.30524	-1.62316
LVIS_1781:amino acid transporter	[E] Amino acid transport and metabolism	-1.20898	-1.25729	-0.765713
LVIS_1907:phosphomannomutase	[G] Carbohydrate transport and metabolism	-1.78888	-1.19929	-0.375438
LVIS_1958:3-methyladenine DNA glycosylase	[L] Replication, recombination and repair	-1.91631	-1.6414	-0.848082
LVIS_1959:ABC-type oligopeptide transport system, periplasmic component	[E] Amino acid transport and metabolism	-2.24811	-1.71419	-0.743325
LVIS_1960:hypothetical protein LVIS_1960	[S] Function unknown	-1.96429	-1.23274	-0.569948
LVIS_1974:hypothetical protein LVIS_1974	[S] Function unknown	-0.0442773	-1.13892	-1.17933
LVIS_1981:hypothetical protein LVIS_1981	[S] Function unknown	-1.47217	-1.55255	-1.75296
LVIS_1982:hypothetical protein LVIS_1982	[S] Function unknown	-2.03051	-2.00323	-1.85104
LVIS_2023:carbamate kinase	[E] Amino acid transport and metabolism	-2.10087	-1.92977	-1.32613
LVIS_2024:transaminase	[E] Amino acid transport and metabolism	-2.52116	-1.84852	-1.17774
LVIS_2025:amino acid transporter	[E] Amino acid transport and metabolism	-2.48926	-1.58782	-0.858186
LVIS_2026:ornithine carbamoyltransferase	[E] Amino acid transport and metabolism	-2.65492	-1.86069	-0.324356
LVIS_2027:arginine deiminase	[E] Amino acid transport and metabolism	-3.69775	-2.03942	-0.885199
LVIS_2085:hypothetical protein LVIS_2085	[S] Function unknown	-1.96875	-1.91997	-1.45863
LVIS_2086:hypothetical protein LVIS_2086	[S] Function unknown	-1.86101	-1.58874	-1.19005
LVIS_2160:lactoylglutathione lyase related lyase	[S] Function unknown	-0.926303	-1.49841	-0.927799
LVIS_2161:hypothetical protein LVIS_2161	[S] Function unknown	-1.43611	-1.21398	-1.42563
LVIS_2169:phosphoglycerate mutase family protein	[G] Carbohydrate transport and metabolism	-1.64485	-1.43805	-1.38657
LVIS_2176:hypothetical protein LVIS_2176	[S] Function unknown	-0.987734	-1.4962	-1.08147
LVIS_2177:hypothetical protein LVIS_2177	[S] Function unknown	-1.19277	-1.36531	-0.930133
LVIS_2211:Na+/H+ antiporter	[C] Energy production and conversion	-2.07186	-1.69883	-1.31225
LVIS_2212:amino acid transporter	[E] Amino acid transport and metabolism	-1.70193	-1.43185	-0.713392
LVIS_2213:glutamate decarboxylase	[E] Amino acid transport and metabolism	-2.26781	-1.77921	-1.17285
LVIS_2214:tyrosyl-tRNA synthetase	[J] Translation, ribosomal structure and biogenesis	-1.10048	-1.66522	-0.931659
LVIS_2215:hypothetical protein LVIS_2215	[S] Function unknown	-1.1302	-1.50622	-1.23673
LVIS_2274:xanthine/uracil/vitamin C permease	[R] General function prediction only	-1.45017	-1.37008	-1.21242
Gene Description	COG(s)	T1	T2	T3	135 min
LVIS_0078:glutamate gamma-aminobutyrate antiporter	[E] Amino acid transport and metabolism	-0.950123	-1.72516	-1.29744
LVIS_0080:glutamyl- and glutaminyl-tRNA synthetase	[J] Translation, ribosomal structure and biogenesis	-0.632347	-1.03373	-1.16063
LVIS_0159:transcriptional regulator	[K] Transcription	-1.31214	-1.29204	-1.20479
LVIS_0322:transcriptional regulator	[K] Transcription	-1.57425	-1.6159	-1.37076
LVIS_0333:NAD(FAD)-dependent dehydrogenase	[R] General function prediction only	-0.752024	-1.44592	-1.36107
LVIS_0401:ABC transporter ATPase	[R] General function prediction only	-0.34667	-1.01607	-1.47958
LVIS_0413:glycerate kinase	[G] Carbohydrate transport and metabolism	-1.07178	-1.04914	-1.56074
LVIS_0422:hypothetical protein LVIS_0422	[S] Function unknown	-0.790416	-0.808886	-1.24748
LVIS_0424:tyrosyl-tRNA synthetase	[J] Translation, ribosomal structure and biogenesis	-1.47967	-1.66057	-1.60926
LVIS_0480:putative phosphoketolase	[G] Carbohydrate transport and metabolism	-1.30019	-0.562332	-1.2439
LVIS_0514:L-lactate dehydrogenase	[C] Energy production and conversion	-0.352149	-0.2355	-1.4937
LVIS_0588:50S ribosomal protein L11	[J] Translation, ribosomal structure and biogenesis	-0.982931	-0.776031	-1.16533
LVIS_0589:50S ribosomal protein L1	[J] Translation, ribosomal structure and biogenesis	-1.50903	-1.21801	-1.15386
LVIS_0590:ribosomal protein L10	[J] Translation, ribosomal structure and biogenesis	-1.86745	-1.77384	-1.45926
LVIS_0591:ribosomal protein L7/L12	[J] Translation, ribosomal structure and biogenesis	-0.968344	-0.66376	-1.15271
LVIS_0661:glyceraldehyde-3-phosphate dehydrogenase	[G] Carbohydrate transport and metabolism	-1.60884	-1.0174	-1.19158
LVIS_0689:glucosamine-6-phosphate isomerase	[G] Carbohydrate transport and metabolism	-1.71319	-1.54336	-1.3798
LVIS_0779:nucleoid DNA-binding protein	[L] Replication, recombination and repair	-1.34163	-1.75565	-1.26385
LVIS_0803:hypothetical protein LVIS_0803	[S] Function unknown	-1.08706	-1.45791	-1.46209
LVIS_0833:lipoprotein signal peptidase	[M] Cell wall/membrane/envelope biogenesis,[U] Intracellular trafficking, secretion, and vesicular transport	-0.164884	-0.555408	-1.21102
LVIS_0883:hypothetical protein LVIS_0883	[S] Function unknown	-0.807896	-1.40818	-1.34146
LVIS_1036:threonyl-tRNA synthetase	[J] Translation, ribosomal structure and biogenesis	-1.37992	-1.42121	-1.34257
LVIS_1047:UDP-N-acetylmuramate--L-alanine ligase	[M] Cell wall/membrane/envelope biogenesis	-0.819739	-1.04397	-1.2705
LVIS_1058:polysaccharide transporter	[R] General function prediction only	-0.697003	-0.831816	-1.16826
LVIS_1089:hypothetical protein LVIS_1089	[S] Function unknown	-0.665222	-1.04463	-1.3106
LVIS_1101:Phage Mu protein F like protein	[S] Function unknown	-0.200756	-1.03839	-1.16163
LVIS_1103:Phage terminase large subunit	[S] Function unknown	-0.724797	-0.913214	-1.16572
LVIS_1108:hypothetical protein LVIS_1108	[S] Function unknown	-0.184248	-0.419936	-1.15627
LVIS_1143:hypothetical protein LVIS_1143	[S] Function unknown	-0.482565	-1.57537	-1.69715
LVIS_1144:hypothetical protein LVIS_1144	[S] Function unknown	-0.857688	-1.44551	-1.31326
LVIS_1326:D-alanine--D-alanyl carrier protein ligase	[Q] Secondary metabolites biosynthesis, transport and catabolism	-1.2907	-1.40699	-1.19514
LVIS_1376:adenine phosphoribosyltransferase	[F] Nucleotide transport and metabolism	-1.74106	-1.11627	-1.32311
LVIS_1379:beta-lactamase superfamily hydrolase	[R] General function prediction only	-1.18847	-1.11845	-1.15215
LVIS_1389:elongation factor Tu	[J] Translation, ribosomal structure and biogenesis	-2.16821	-1.9121	-1.69468
LVIS_1416:hypothetical protein LVIS_1416	[S] Function unknown	-2.66957	-2.21655	-2.54541
LVIS_1423:Aryl-alcohol dehydrogenase related enzyme	[C] Energy production and conversion	-0.503267	-1.00628	-1.42531
LVIS_1475:hypothetical protein LVIS_1475	[S] Function unknown	-1.41574	-1.62756	-1.63557
LVIS_1496:N-acetylmuramoyl-L-alanine amidase	[M] Cell wall/membrane/envelope biogenesis	-1.57815	-1.27336	-1.27924
LVIS_1523:S-adenosylmethionine synthetase	[H] Coenzyme transport and metabolism	-2.04051	-1.73677	-1.27447
LVIS_1548:integral membrane protein	[S] Function unknown	0.0802345	-0.961382	-1.17999
LVIS_1558:NAD(FAD)-dependent dehydrogenase	[R] General function prediction only	-1.37619	-1.28807	-1.51716
LVIS_1571:flavodoxin	[C] Energy production and conversion	-0.780382	-0.946111	-1.26681
LVIS_1673:30S ribosomal protein S5	[J] Translation, ribosomal structure and biogenesis	-0.59187	-0.238563	-1.10145
LVIS_1712:amino acid transporter	[E] Amino acid transport and metabolism	0.236019	-1.47107	-1.1791
LVIS_1720:acetyltransferase	[J] Translation, ribosomal structure and biogenesis	-2.61998	-2.30524	-1.62316
LVIS_1723:hypothetical protein LVIS_1723	[S] Function unknown	-0.448474	-1.14457	-1.42577
LVIS_1724:major facilitator superfamily permease	[G] Carbohydrate transport and metabolism	-0.623083	-1.11826	-1.32702
LVIS_1974:hypothetical protein LVIS_1974	[S] Function unknown	-0.0442773	-1.13892	-1.17933
LVIS_1981:hypothetical protein LVIS_1981	[S] Function unknown	-1.47217	-1.55255	-1.75296
LVIS_1982:hypothetical protein LVIS_1982	[S] Function unknown	-2.03051	-2.00323	-1.85104
LVIS_1983:hypothetical protein LVIS_1983	[S] Function unknown	-1.28903	-0.835365	-1.31397
LVIS_2023:carbamate kinase	[E] Amino acid transport and metabolism	-2.10087	-1.92977	-1.32613
LVIS_2024:transaminase	[E] Amino acid transport and metabolism	-2.52116	-1.84852	-1.17774
LVIS_2085:hypothetical protein LVIS_2085	[S] Function unknown	-1.96875	-1.91997	-1.45863
LVIS_2086:hypothetical protein LVIS_2086	[S] Function unknown	-1.86101	-1.58874	-1.19005
LVIS_2161:hypothetical protein LVIS_2161	[S] Function unknown	-1.43611	-1.21398	-1.42563
LVIS_2162:threonine dehydrogenase related Zn-dependent dehydrogenase	[E] Amino acid transport and metabolism,[R] General function prediction only	-0.84742	-0.953365	-1.33623
LVIS_2163:transcriptional regulator and fructokinase	[G] Carbohydrate transport and metabolism,[K] Transcription	-0.426529	-0.604114	-1.21105
LVIS_2169:phosphoglycerate mutase family protein	[G] Carbohydrate transport and metabolism	-1.64485	-1.43805	-1.38657
LVIS_2211:Na+/H+ antiporter	[C] Energy production and conversion	-2.07186	-1.69883	-1.31225
LVIS_2213:glutamate decarboxylase	[E] Amino acid transport and metabolism	-2.26781	-1.77921	-1.17285
LVIS_2215:hypothetical protein LVIS_2215	[S] Function unknown	-1.1302	-1.50622	-1.23673
LVIS_2274:xanthine/uracil/vitamin C permease	[R] General function prediction only	-1.45017	-1.37008	-1.21242

## Sheet: Up
Gene Description	COG(s)	T1	T2	T3	15 min
LVIS_0076:NADPH:quinone reductase related Zn-dependent oxidoreductase	[C] Energy production and conversion,[R] General function prediction only	3.04775	3.05945	2.23763
LVIS_0089:hypothetical protein LVIS_0089	[S] Function unknown	2.79319	2.29018	1.39423		Challenge: 2% butanol
LVIS_0112:molecular chaperone (small heat shock protein)	[O] Posttranslational modification, protein turnover, chaperones	1.95743	2.01146	1.64663
LVIS_0116:cation transport ATPase	[P] Inorganic ion transport and metabolism	1.64062	1.57109	0.786004
LVIS_0117:BS_ykrK family protein	[S] Function unknown	1.58916	0.444558	0.624776
LVIS_0327:transcriptional regulator	[K] Transcription	1.79697	0.304592	0.164357
LVIS_0332:hypothetical protein LVIS_0332	[S] Function unknown	1.88824	0.202187	-0.246111
LVIS_0352:hypothetical protein LVIS_0352	[S] Function unknown	1.58974	0.564589	0.590679
LVIS_0360:ribosomal protein S14	[J] Translation, ribosomal structure and biogenesis	1.76571	2.12188	1.20035
LVIS_0367:arsenate reductase	[P] Inorganic ion transport and metabolism	1.62622	1.39308	0.709901
LVIS_0418:hypothetical protein LVIS_0418	[S] Function unknown	1.85471	0.537557	0.305695
LVIS_0471:ABC-type Mn/Zn transport system, ATPase component	[P] Inorganic ion transport and metabolism	1.63874	1.55622	0.687494
LVIS_0566:ABC-type metal ion transport system, periplasmic component/surface adhesin	[P] Inorganic ion transport and metabolism	2.15476	0.907824	0.430842
LVIS_0723:large-conductance mechanosensitive channel	[M] Cell wall/membrane/envelope biogenesis	1.60897	1.10658	0.778489
LVIS_0762:ATP-binding subunit of Clp protease and DnaK/DnaJ chaperones	[O] Posttranslational modification, protein turnover, chaperones	3.50711	2.77638	1.69396
LVIS_0763:DNA polymerase III, alpha subunit	[L] Replication, recombination and repair	1.57227	0.698183	-0.00753978
LVIS_0870:hypothetical protein LVIS_0870	[S] Function unknown	1.57233	0.577265	0.31588
LVIS_0935:3-oxoacyl-(acyl carrier protein) synthase III	[I] Lipid transport and metabolism	1.555	2.23167	2.62184
LVIS_0938:hypothetical protein LVIS_0938	[S] Function unknown	2.25851	2.12744	0.0309024
LVIS_0963:Serine/threonine protein phosphatase	[T] Signal transduction mechanisms	1.61709	0.441282	0.244147
LVIS_1069:hypothetical protein LVIS_1069	[S] Function unknown	2.46826	0.538986	0.0645558
LVIS_1070:Zn peptidase	[E] Amino acid transport and metabolism	2.55778	1.38652	0.725275
LVIS_1071:hypothetical protein LVIS_1071	[S] Function unknown	3.37926	2.27225	1.24907
LVIS_1150:monooxygenase	[S] Function unknown	1.68236	0.458701	0.697249
LVIS_1198:Type II secretory pathway/competence component, ATPase	[N] Cell motility,[U] Intracellular trafficking, secretion, and vesicular transport	2.06636	0.997032	0.312518
LVIS_1328:DnaJ-like molecular chaperone	[O] Posttranslational modification, protein turnover, chaperones	1.86599	2.20555	1.87147
LVIS_1372:diacylglycerol kinase family lipid kinase	[I] Lipid transport and metabolism,[R] General function prediction only	1.65069	0.792311	0.507896
LVIS_1374:hypothetical protein LVIS_1374	[S] Function unknown	2.23736	2.07729	1.71219
LVIS_1375:UspA family nucleotide-binding protein	[T] Signal transduction mechanisms	2.69358	3.34119	2.40757
LVIS_1470:hypothetical protein LVIS_1470	[S] Function unknown	1.41316	2.62214	-0.0657992
LVIS_1476:oligoendopeptidase F	[E] Amino acid transport and metabolism	1.8659	2.03219	1.3639
LVIS_1505:hypothetical protein LVIS_1505	[S] Function unknown	2.1061	0.992787	0.716796
LVIS_1513:transcriptional regulator	[K] Transcription	1.7057	1.60752	0.535579
LVIS_1653:pyrimidine reductase, riboflavin biosynthesis	[H] Coenzyme transport and metabolism	1.67857	0.705656	0.687322
LVIS_1700:ATP-binding subunit of Clp protease and DnaK/DnaJ chaperones	[O] Posttranslational modification, protein turnover, chaperones	1.65732	1.58986	1.57189
LVIS_1701:transcriptional repressor of class III stress genes	[K] Transcription	2.01102	1.62634	1.55661
LVIS_1742:L-ribulokinase (putative)	[G] Carbohydrate transport and metabolism	2.13151	0.76833	0.995517
LVIS_1746:transcriptional regulator	[K] Transcription	2.02783	0.135887	1.13285
LVIS_1765:ABC-type oligopeptide transport system, ATPase component	[E] Amino acid transport and metabolism	1.87461	1.59146	1.21803
LVIS_1766:ABC-type dipeptide/oligopeptide/nickel transport system, ATPase component	[P] Inorganic ion transport and metabolism,[E] Amino acid transport and metabolism	1.76407	1.3213	1.71833
LVIS_1844:aldo/keto reductase	[R] General function prediction only	2.30274	2.85306	2.24127
LVIS_2001:transcriptional regulator	[K] Transcription	1.66432	-0.0904426	0.0202481
LVIS_2011:hypothetical protein LVIS_2011	[S] Function unknown	2.82054	1.89472	1.64585
LVIS_2012:hypothetical protein LVIS_2012	[S] Function unknown	1.68045	1.96454	2.72076
LVIS_2120:transcriptional regulator/sugar kinase	[G] Carbohydrate transport and metabolism,[K] Transcription	1.62928	1.11932	0.624828
LVIS_2139:hypothetical protein LVIS_2139	[S] Function unknown	1.56569	0.669806	0.716313
LVIS_2222:hypothetical protein LVIS_2222	[S] Function unknown	2.25746	1.17691	0.764735
LVIS_2223:hypothetical protein LVIS_2223	[S] Function unknown	2.17482	1.39804	1.14871
Gene Description	COG(s)	T1	T2	T3	75 min
LVIS_0076:NADPH:quinone reductase related Zn-dependent oxidoreductase	[C] Energy production and conversion,[R] General function prediction only	3.04775	3.05945	2.23763
LVIS_0089:hypothetical protein LVIS_0089	[S] Function unknown	2.79319	2.29018	1.39423
LVIS_0099:Aryl-alcohol dehydrogenase related enzyme	[C] Energy production and conversion	0.99019	1.833	1.112
LVIS_0112:molecular chaperone (small heat shock protein)	[O] Posttranslational modification, protein turnover, chaperones	1.95743	2.01146	1.64663
LVIS_0116:cation transport ATPase	[P] Inorganic ion transport and metabolism	1.64062	1.57109	0.786004
LVIS_0187:acetoin reductase	[I] Lipid transport and metabolism,[R] General function prediction only,[Q] Secondary metabolites biosynthesis, transport and catabolism	-0.126487	1.80112	1.84172
LVIS_0210:hypothetical protein LVIS_0210	[S] Function unknown	-0.28224	1.7923	0.465643
LVIS_0236:hypothetical protein LVIS_0236	[S] Function unknown	0.859061	1.92847	1.96111
LVIS_0320:NADH dehydrogenase, FAD-containing subunit	[C] Energy production and conversion	1.45719	2.02242	2.18894
LVIS_0360:ribosomal protein S14	[J] Translation, ribosomal structure and biogenesis	1.76571	2.12188	1.20035
LVIS_0379:nucleoside-diphosphate-sugar epimerase	[M] Cell wall/membrane/envelope biogenesis,[G] Carbohydrate transport and metabolism	0.538932	1.82481	0.250726
LVIS_0436:hypothetical protein LVIS_0436	[S] Function unknown	0.838869	1.35337	0.654309
LVIS_0438:hypothetical protein LVIS_0438	[S] Function unknown	-0.320094	1.68867	-0.00683344
LVIS_0471:ABC-type Mn/Zn transport system, ATPase component	[P] Inorganic ion transport and metabolism	1.63874	1.55622	0.687494
LVIS_0472:ABC-type Mn2+/Zn2+ transport system, permease component	[P] Inorganic ion transport and metabolism	1.44401	1.58506	0.85412
LVIS_0512:hypothetical protein LVIS_0512	[S] Function unknown	0.76917	1.84115	-0.238628
LVIS_0533:cellobiose-specific PTS system IIC component	[S] Function unknown	0.662846	3.31754	1.33554
LVIS_0762:ATP-binding subunit of Clp protease and DnaK/DnaJ chaperones	[O] Posttranslational modification, protein turnover, chaperones	3.50711	2.77638	1.69396
LVIS_0809:peptide methionine sulfoxide reductase domain-containing protein	[O] Posttranslational modification, protein turnover, chaperones	1.14296	1.96773	2.35547
LVIS_0810:peptide methionine sulfoxide reductase	[O] Posttranslational modification, protein turnover, chaperones	1.00691	1.54682	2.12603
LVIS_0811:ADP-ribose pyrophosphatase	[F] Nucleotide transport and metabolism	1.32238	2.025	2.46114
LVIS_0925:enoyl-(acyl carrier protein) reductase	[I] Lipid transport and metabolism	0.495679	1.90545	1.82231
LVIS_0928:biotin carboxylase	[I] Lipid transport and metabolism	0.772751	1.84521	2.41129
LVIS_0929:3-hydroxymyristoyl/3-hydroxydecanoyl-(acyl carrier protein) dehydratase	[I] Lipid transport and metabolism	1.04959	1.7937	2.23106
LVIS_0931:3-oxoacyl-(acyl-carrier-protein) synthase	[I] Lipid transport and metabolism,[Q] Secondary metabolites biosynthesis, transport and catabolism	0.615918	1.61025	3.1981
LVIS_0932:3-oxoacyl-acyl carrier protein reductase	[I] Lipid transport and metabolism,[R] General function prediction only,[Q] Secondary metabolites biosynthesis, transport and catabolism	0.676149	2.35894	2.97503
LVIS_0933:(acyl-carrier-protein) S-malonyltransferase	[I] Lipid transport and metabolism	0.744502	2.15404	2.75601
LVIS_0934:Acyl carrier protein	[I] Lipid transport and metabolism,[Q] Secondary metabolites biosynthesis, transport and catabolism	0.361242	2.08313	2.59074
LVIS_0935:3-oxoacyl-(acyl carrier protein) synthase III	[I] Lipid transport and metabolism	1.555	2.23167	2.62184
LVIS_0936:transcriptional regulator	[K] Transcription	0.909229	2.36763	2.47856
LVIS_0937:3-hydroxymyristoyl/3-hydroxydecanoyl-(acyl carrier protein) dehydratase	[I] Lipid transport and metabolism	1.20397	2.39974	2.78103
LVIS_0938:hypothetical protein LVIS_0938	[S] Function unknown	2.25851	2.12744	0.0309024
LVIS_1071:hypothetical protein LVIS_1071	[S] Function unknown	3.37926	2.27225	1.24907
LVIS_1117:hypothetical protein LVIS_1117	[S] Function unknown	0.755447	1.36048	0.261722
LVIS_1138:hypothetical protein LVIS_1138	[S] Function unknown	-1.38544	2.53368	1.5104
LVIS_1178:Short-chain alcohol dehydrogenase	[I] Lipid transport and metabolism,[R] General function prediction only,[Q] Secondary metabolites biosynthesis, transport and catabolism	0.865386	1.52989	1.24863
LVIS_1216:Thiol-disulfide isomerase and thioredoxin	[O] Posttranslational modification, protein turnover, chaperones	1.18043	1.6	1.51792
LVIS_1328:DnaJ-like molecular chaperone	[O] Posttranslational modification, protein turnover, chaperones	1.86599	2.20555	1.87147
LVIS_1374:hypothetical protein LVIS_1374	[S] Function unknown	2.23736	2.07729	1.71219
LVIS_1375:UspA family nucleotide-binding protein	[T] Signal transduction mechanisms	2.69358	3.34119	2.40757
LVIS_1470:hypothetical protein LVIS_1470	[S] Function unknown	1.41316	2.62214	-0.0657992
LVIS_1476:oligoendopeptidase F	[E] Amino acid transport and metabolism	1.8659	2.03219	1.3639
LVIS_1507:hypothetical protein LVIS_1507	[S] Function unknown	0.193025	1.56505	0.799996
LVIS_1513:transcriptional regulator	[K] Transcription	1.7057	1.60752	0.535579
LVIS_1554:ATP-binding subunit of Clp protease and DnaK/DnaJ chaperones	[O] Posttranslational modification, protein turnover, chaperones	1.49582	1.7253	0.886341
LVIS_1700:ATP-binding subunit of Clp protease and DnaK/DnaJ chaperones	[O] Posttranslational modification, protein turnover, chaperones	1.65732	1.58986	1.57189
LVIS_1701:transcriptional repressor of class III stress genes	[K] Transcription	2.01102	1.62634	1.55661
LVIS_1734:acetyltransferase	[R] General function prediction only	1.12425	2.1517	1.53962
LVIS_1765:ABC-type oligopeptide transport system, ATPase component	[E] Amino acid transport and metabolism	1.87461	1.59146	1.21803
LVIS_1844:aldo/keto reductase	[R] General function prediction only	2.30274	2.85306	2.24127
LVIS_1845:hypothetical protein LVIS_1845	[S] Function unknown	1.22828	1.9696	0.948753
LVIS_1846:hypothetical protein LVIS_1846	[S] Function unknown	0.903708	1.55426	0.715758
LVIS_1953:hypothetical protein LVIS_1953	[S] Function unknown	1.47111	2.41844	2.41255
LVIS_2011:hypothetical protein LVIS_2011	[S] Function unknown	2.82054	1.89472	1.64585
LVIS_2012:hypothetical protein LVIS_2012	[S] Function unknown	1.68045	1.96454	2.72076
LVIS_2143:arylsulfate sulfotransferase	[S] Function unknown	1.30537	1.66015	1.46255
LVIS_2189:DNA-binding transcriptional activator YeiL	[T] Signal transduction mechanisms	0.0714834	1.93097	0.573956
LVIS_2202:malate permease	[R] General function prediction only	-0.0961923	1.62276	0.203529
LVIS_2203:malate dehydrogenase	[C] Energy production and conversion	-0.261909	1.71658	0.186962
Gene Description	COG(s)	T1	T2	T3	135 min
LVIS_0076:NADPH:quinone reductase related Zn-dependent oxidoreductase	[C] Energy production and conversion,[R] General function prediction only	3.04775	3.05945	2.23763
LVIS_0089:hypothetical protein LVIS_0089	[S] Function unknown	2.79319	2.29018	1.39423
LVIS_0112:molecular chaperone (small heat shock protein)	[O] Posttranslational modification, protein turnover, chaperones	1.95743	2.01146	1.64663
LVIS_0187:acetoin reductase	[I] Lipid transport and metabolism,[R] General function prediction only,[Q] Secondary metabolites biosynthesis, transport and catabolism	-0.126487	1.80112	1.84172
LVIS_0215:transcriptional regulator	[S] Function unknown	0.650076	1.47063	1.46702
LVIS_0236:hypothetical protein LVIS_0236	[S] Function unknown	0.859061	1.92847	1.96111
LVIS_0281:oxidoreductase; Myosin-crossreactive antigen ortholog	[S] Function unknown	-0.799394	0.55771	1.34265
LVIS_0320:NADH dehydrogenase, FAD-containing subunit	[C] Energy production and conversion	1.45719	2.02242	2.18894
LVIS_0357:major facilitator superfamily permease	[G] Carbohydrate transport and metabolism	-0.200076	0.715207	1.43501
LVIS_0473:hypothetical protein LVIS_0473	[S] Function unknown	0.0325717	1.01494	1.88314
LVIS_0533:cellobiose-specific PTS system IIC component	[S] Function unknown	0.662846	3.31754	1.33554
LVIS_0565:hypothetical protein LVIS_0565	[S] Function unknown	-0.0788292	0.460641	1.39689
LVIS_0762:ATP-binding subunit of Clp protease and DnaK/DnaJ chaperones	[O] Posttranslational modification, protein turnover, chaperones	3.50711	2.77638	1.69396
LVIS_0809:peptide methionine sulfoxide reductase domain-containing protein	[O] Posttranslational modification, protein turnover, chaperones	1.14296	1.96773	2.35547
LVIS_0810:peptide methionine sulfoxide reductase	[O] Posttranslational modification, protein turnover, chaperones	1.00691	1.54682	2.12603
LVIS_0811:ADP-ribose pyrophosphatase	[F] Nucleotide transport and metabolism	1.32238	2.025	2.46114
LVIS_0864:succinyl-diaminopimelate desuccinylase	[E] Amino acid transport and metabolism	-0.0514132	1.1124	1.5611
LVIS_0917:hypothetical protein LVIS_0917	[S] Function unknown	0.173879	-0.278233	1.55773
LVIS_0923:hypothetical protein LVIS_0923	[R] General function prediction only	1.11916	1.37534	1.64612
LVIS_0924:biotin operon repressor	[H] Coenzyme transport and metabolism	0.363891	1.50183	1.43167
LVIS_0925:enoyl-(acyl carrier protein) reductase	[I] Lipid transport and metabolism	0.495679	1.90545	1.82231
LVIS_0926:Acetyl-CoA carboxylase alpha subunit	[I] Lipid transport and metabolism	0.295651	0.536443	1.68498
LVIS_0927:Acetyl-CoA carboxylase beta subunit	[I] Lipid transport and metabolism	1.25795	1.33011	1.88275
LVIS_0928:biotin carboxylase	[I] Lipid transport and metabolism	0.772751	1.84521	2.41129
LVIS_0929:3-hydroxymyristoyl/3-hydroxydecanoyl-(acyl carrier protein) dehydratase	[I] Lipid transport and metabolism	1.04959	1.7937	2.23106
LVIS_0930:biotin carboxyl carrier protein	[I] Lipid transport and metabolism	-0.22147	1.1887	1.4348
LVIS_0931:3-oxoacyl-(acyl-carrier-protein) synthase	[I] Lipid transport and metabolism,[Q] Secondary metabolites biosynthesis, transport and catabolism	0.615918	1.61025	3.1981
LVIS_0932:3-oxoacyl-acyl carrier protein reductase	[I] Lipid transport and metabolism,[R] General function prediction only,[Q] Secondary metabolites biosynthesis, transport and catabolism	0.676149	2.35894	2.97503
LVIS_0933:(acyl-carrier-protein) S-malonyltransferase	[I] Lipid transport and metabolism	0.744502	2.15404	2.75601
LVIS_0934:Acyl carrier protein	[I] Lipid transport and metabolism,[Q] Secondary metabolites biosynthesis, transport and catabolism	0.361242	2.08313	2.59074
LVIS_0935:3-oxoacyl-(acyl carrier protein) synthase III	[I] Lipid transport and metabolism	1.555	2.23167	2.62184
LVIS_0936:transcriptional regulator	[K] Transcription	0.909229	2.36763	2.47856
LVIS_0937:3-hydroxymyristoyl/3-hydroxydecanoyl-(acyl carrier protein) dehydratase	[I] Lipid transport and metabolism	1.20397	2.39974	2.78103
LVIS_1136:hypothetical protein LVIS_1136	[S] Function unknown	-0.117982	0.0273519	1.5895
LVIS_1182:cell surface protein	[S] Function unknown	-0.182	0.699491	1.41823
LVIS_1216:Thiol-disulfide isomerase and thioredoxin	[O] Posttranslational modification, protein turnover, chaperones	1.18043	1.6	1.51792
LVIS_1328:DnaJ-like molecular chaperone	[O] Posttranslational modification, protein turnover, chaperones	1.86599	2.20555	1.87147
LVIS_1374:hypothetical protein LVIS_1374	[S] Function unknown	2.23736	2.07729	1.71219
LVIS_1375:UspA family nucleotide-binding protein	[T] Signal transduction mechanisms	2.69358	3.34119	2.40757
LVIS_1410:acetoin dehydrogenase complex, E1 component, alpha subunit	[C] Energy production and conversion	-0.117163	0.90206	1.41184
LVIS_1591:thymidine phosphorylase	[F] Nucleotide transport and metabolism	0.470321	1.05243	1.4394
LVIS_1592:citrate lyase regulator	[K] Transcription	0.438297	0.400688	2.00288
LVIS_1593:purine-nucleoside phosphorylase	[F] Nucleotide transport and metabolism	-0.144158	1.02825	1.53731
LVIS_1594:phosphopentomutase	[G] Carbohydrate transport and metabolism	-0.973608	1.13592	1.82143
LVIS_1595:deoxyribose-phosphate aldolase	[F] Nucleotide transport and metabolism	-0.183426	1.24697	2.28066
LVIS_1700:ATP-binding subunit of Clp protease and DnaK/DnaJ chaperones	[O] Posttranslational modification, protein turnover, chaperones	1.65732	1.58986	1.57189
LVIS_1701:transcriptional repressor of class III stress genes	[K] Transcription	2.01102	1.62634	1.55661
LVIS_1734:acetyltransferase	[R] General function prediction only	1.12425	2.1517	1.53962
LVIS_1766:ABC-type dipeptide/oligopeptide/nickel transport system, ATPase component	[P] Inorganic ion transport and metabolism,[E] Amino acid transport and metabolism	1.76407	1.3213	1.71833
LVIS_1807:transcriptional regulator	[K] Transcription	-0.103433	0.25323	1.88275
LVIS_1844:aldo/keto reductase	[R] General function prediction only	2.30274	2.85306	2.24127
LVIS_1858:hypothetical protein LVIS_1858	[S] Function unknown	0.301916	-0.0380059	2.81617
LVIS_1867:hypothetical protein LVIS_1867	[S] Function unknown	1.08064	1.31594	1.53609
LVIS_1953:hypothetical protein LVIS_1953	[S] Function unknown	1.47111	2.41844	2.41255
LVIS_1975:aldo/keto reductase	[R] General function prediction only	-0.0475986	1.51276	1.43057
LVIS_2011:hypothetical protein LVIS_2011	[S] Function unknown	2.82054	1.89472	1.64585
LVIS_2012:hypothetical protein LVIS_2012	[S] Function unknown	1.68045	1.96454	2.72076
LVIS_2091:DNA-directed RNA polymerase specialized sigma subunit, sigma24-like	[S] Function unknown	0.667838	-0.519926	2.24717
LVIS_2143:arylsulfate sulfotransferase	[S] Function unknown	1.30537	1.66015	1.46255
LVIS_2245:acetyltransferase	[R] General function prediction only	0.616012	1.37391	1.5301
LVIS_2259:Beta-galactosidase	[G] Carbohydrate transport and metabolism	-0.395945	1.3395	1.78077
